# Supplementary material for: Ligand-unsupported Au(i) chains with short Au(i)⋯Au(i) contacts
Source: Royal Society of Chemistry journal article supplement (doi:10.1039/b606999a), 2006-01-01
Supplement: b606999a.pdf [file b606999a.pdf]

## Supporting Information

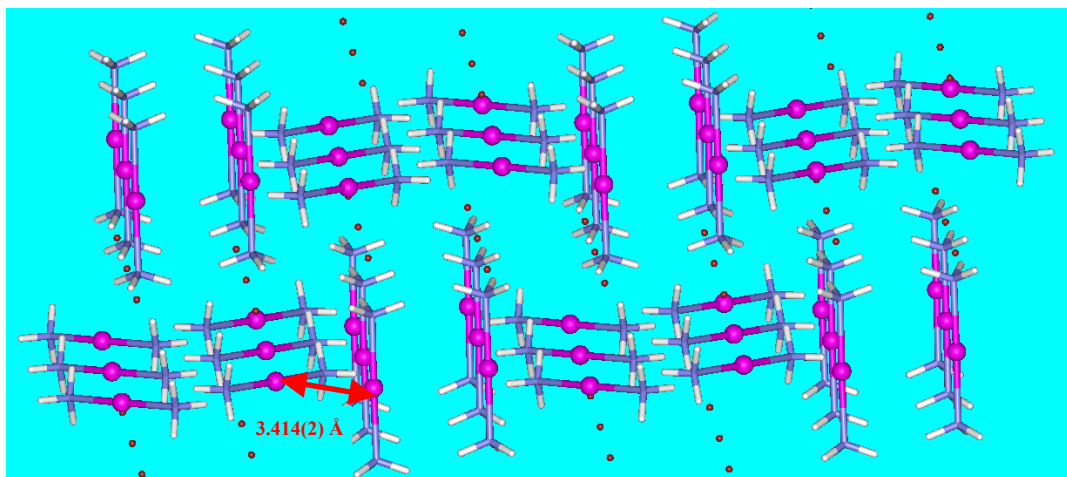

(a)

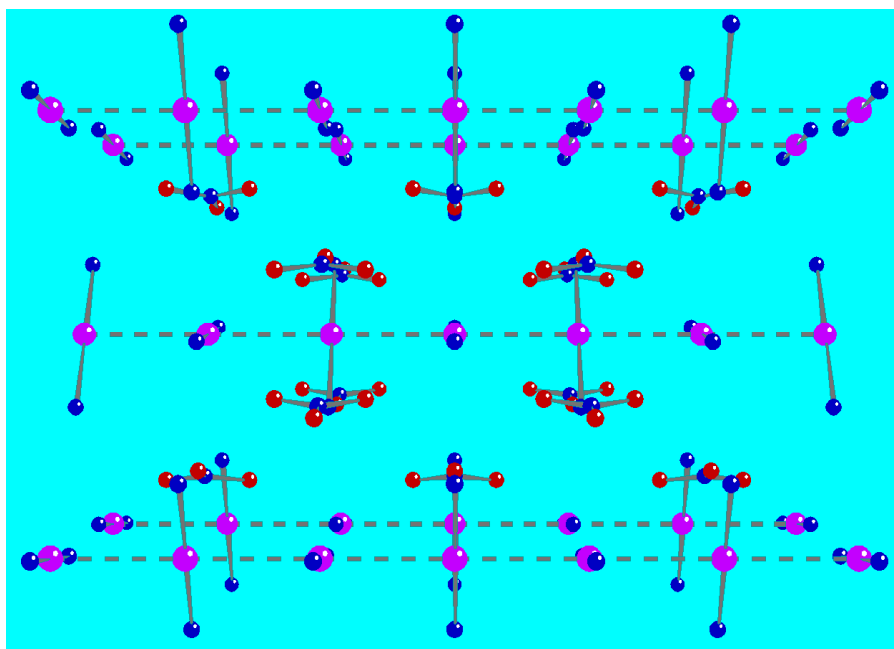

(b)

Figure S1: Perspective views showing the three-dimensional structure of a)  $[\text{Au}(\text{NH}_3)_2]\text{Br}$  [ $\text{Au}\cdots\text{Au}$  3.414(2) Å, with  $\text{Au}\cdots\text{Au}$  distances in the “chains” up to 4.787 and 5.594Å] and b)  $[\text{Ag}(\text{NH}_3)_2]\text{NO}_3$  [ $\text{Ag}\cdots\text{Ag}$  3.131(2) Å]

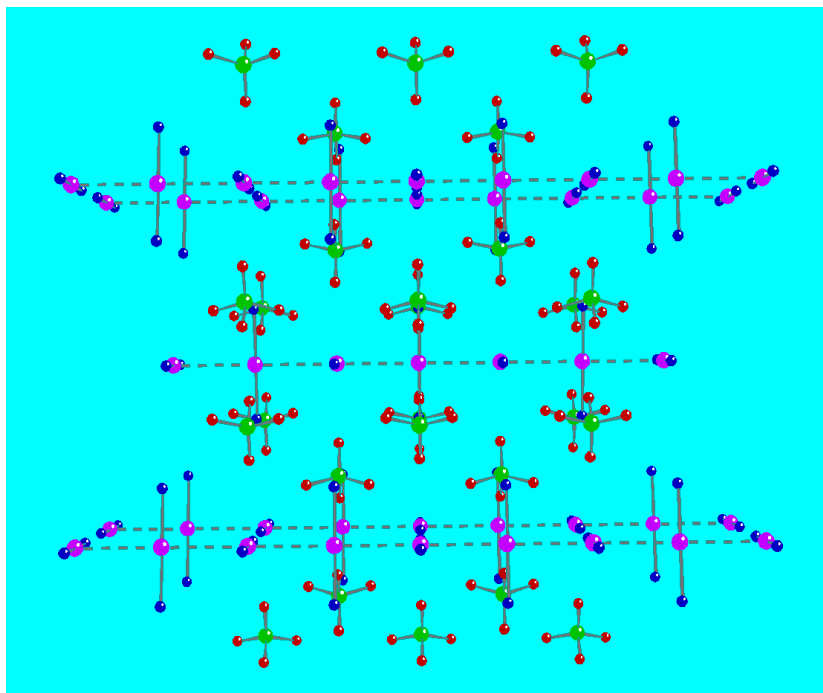

Figure S2: Perspective views showing the three-dimensional structure of  $[\text{Ag}(\text{NH}_3)_2]\text{ClO}_4$  [ $\text{Ag}\cdots\text{Ag}$  3.020(2) Å].

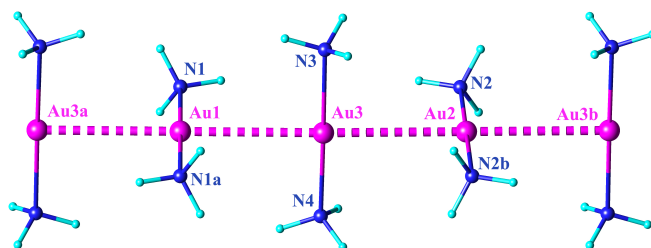

(a)

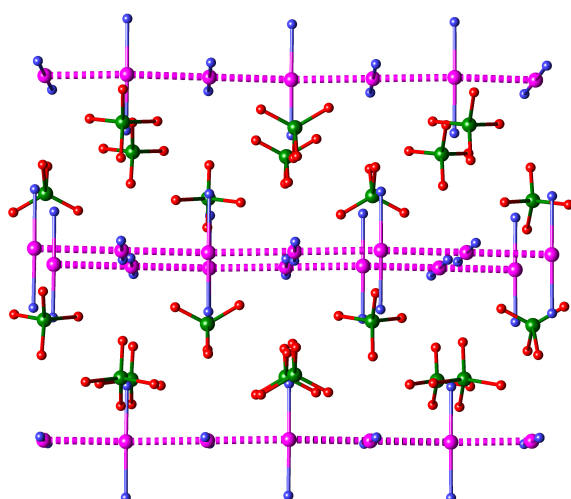

(b)

Figure S3: Perspective views showing a) the structure of  $[\text{Au}(\text{NH}_3)_2]^+$  ( $\text{Au}\cdots\text{Au}$  2.976(5)-2.9836(5) Å) and b) the three-dimensional supramolecular array in **1'**.
